# Supplementary material
Source: PubMed Central journal article supplement (PMC7348548)
Supplement: JB.00132-20-s0001.pdf [file JB.00132-20-s0001.pdf]

## **Supplemental information**

### **Context-dependent action of Scc4 reinforces control of the type III secretion system**

Leiqiong Gao<sup>1</sup>, Yanguang Cong<sup>1,2</sup>, Gregory Plano<sup>3</sup>, Xiancai Rao<sup>1,4</sup>, Lyndsey N. Gisclair<sup>1</sup>, Sara Schesser Bartra<sup>3</sup>, Megan Macnaughtan<sup>5</sup>, and Li Shen<sup>1\*</sup>

**Supplemental Table S1 and S2.**

**Supplemental Figures S1-4.**

**Supplemental Table S1. Strains, cell lines and plasmids used in this study**

| Relevant Details                |                                                                                                                                                                                                                             | Reference/Source                    |
|---------------------------------|-----------------------------------------------------------------------------------------------------------------------------------------------------------------------------------------------------------------------------|-------------------------------------|
| <b>Strains</b>                  |                                                                                                                                                                                                                             |                                     |
| <b><i>C. trachomatis</i></b>    |                                                                                                                                                                                                                             |                                     |
| L2/25667R                       | Plasmid-free strain                                                                                                                                                                                                         | Gong <i>et al.</i> (1)              |
| L2/Scs4                         | L2/25667R transformed with a plasmid containing P <sub>tet</sub> -directed synthesis of Scs4                                                                                                                                | This study                          |
| L2/vector                       | L2/25667R transformed with pBOMB3                                                                                                                                                                                           | Cong <i>et al.</i> , (2)            |
| <b><i>E. coli</i></b>           |                                                                                                                                                                                                                             |                                     |
| DH5 $\alpha$                    | Host cells for cloning                                                                                                                                                                                                      | Invitrogen                          |
| DH5- $\alpha$ F <sup>'</sup>    | C2992, Host cell for cloning                                                                                                                                                                                                | New England Biolabs                 |
| BL21(DE3)                       | Host cell for P <sub>T7</sub> -directed protein expression                                                                                                                                                                  | Novogen                             |
| GS345                           | <i>E. coli</i> K12 MG1655 wild type $\sigma^{70}$                                                                                                                                                                           | provided by Ann Hochschild          |
| GS235                           | <i>E. coli</i> K12 MG1655 mutant $\sigma^{70}$ (D581G)                                                                                                                                                                      | as above                            |
| GS347                           | <i>E. coli</i> K12 MG1655 mutant $\sigma^{70}$ (A544I/D581G)                                                                                                                                                                | as above                            |
| FW102 O <sub>L</sub> 2-62       | <i>E. coli</i> reporter strain for B2H assay                                                                                                                                                                                | Rao <i>et al.</i> (3)               |
| ER2925                          | methylation deficient <i>E. coli</i> strain                                                                                                                                                                                 | New England Biolabs                 |
| <b><i>Y. pestis</i></b>         |                                                                                                                                                                                                                             |                                     |
| YP769                           | <i>Y. pestis</i> strain carrying a plasmid, pCD1- $\Delta$ 1234, that is deleted for all six effector Yops and their chaperones.                                                                                            | Schesser Bartra <i>et al.</i> , (4) |
| YP1283                          | <i>Y. pestis</i> strain carrying a pCD1 plasmid but is deleted for the <i>yopE</i> gene (and a <i>dhfr</i> gene is inserted)                                                                                                | Schesser Bartra <i>et al.</i> (4)   |
| <b>Cell line</b>                |                                                                                                                                                                                                                             |                                     |
| L929                            | Mmouse fibroblast cell                                                                                                                                                                                                      | ATCC CCL-1                          |
| HeLa 229                        | Human cervical cancer cell line                                                                                                                                                                                             | ATCC CCL-2.1                        |
| <b>Plasmids</b>                 |                                                                                                                                                                                                                             |                                     |
| pCDFScs4                        | P <sub>T7/lacUV5</sub> -directed synthesis of the Scs4 fused to an N-terminal His6-tag                                                                                                                                      | Shen <i>et al.</i> , 2015 (5)       |
| pXDCM                           | P <sub>T7</sub> -directed synthesis of the Scs4                                                                                                                                                                             | Rao <i>et al.</i> , (3)             |
| pLN- $\sigma^{66R24}$           | P <sub>T7</sub> -directed synthesis of N-terminal His6-tagged <i>E. coli</i> $\sigma^{70}$ regions 1 (amino acid residues 1-372) fused to regions 2-4 of <i>C. trachomatis</i> $\sigma^{66}$ (amino acid residues 315–571). | Cong <i>et al.</i> (2)              |
| pBAD66                          | P <sub>ara</sub> -directed synthesis of chlamydial $\sigma^{66}$ fused to an N-terminal His6-tag                                                                                                                            | Rao <i>et al.</i> , (3)             |
| pIA545                          | P <sub>trc</sub> -directed synthesis of <i>E. coli</i> $\beta$ subunit of RNAP fused to an N-terminal His6- tag                                                                                                             | Artsimovitch <i>et al.</i> , (6)    |
| pRV <sub>hctB</sub>             | Promoter reporter containing P <sub>hctB</sub> :: <i>lacZ</i> ;                                                                                                                                                             | Hua <i>et al.</i> (7)               |
| pRV <sub>ompA</sub>             | Promoter reporter containing P <sub>ompA</sub> :: <i>lacZ</i>                                                                                                                                                               | This study                          |
| pQF50KgroE                      | Promoter reporter containing P <sub>E. coli groE</sub> :: <i>lacZ</i>                                                                                                                                                       | Wang <i>et al.</i> (8)              |
| pBAD24-CopN                     | P <sub>araB</sub> -directed synthesis of <i>C. trachomatis</i> CopN                                                                                                                                                         | This study                          |
| pBAD24-CopNScs1                 | P <sub>araB</sub> -directed synthesis of <i>C. trachomatis</i> CopN & Scs1                                                                                                                                                  | This study                          |
| pAC $\lambda$ CI- $\beta$ -flap | P <sub>lacUV5</sub> -directed synthesis of the $\lambda$ CI protein fused to $\beta$ -flap of <i>C. trachomatis</i>                                                                                                         | Rao <i>et al.</i> , (3)             |
| pACScs1                         | P <sub>lacUV5</sub> -directed synthesis of the $\lambda$ CI protein fused to full length <i>C. trachomatis</i> Scs1                                                                                                         | Shen <i>et al.</i> (5),             |
| pACScs4                         | P <sub>lacUV5</sub> -directed synthesis of the $\lambda$ CI protein fused to <i>C. trachomatis</i> Scs4                                                                                                                     | Shen <i>et al.</i> (5)              |
| pRB-sycN                        | P <sub>lacUV5/P<sub>lpp</sub></sub> -directed synthesis of the $\alpha$ NTD of <i>E. coli</i> RNAP fused to <i>Yersinia</i> SycN                                                                                            | This study                          |
| pBR-sycB                        | P <sub>lacUV5/P<sub>lpp</sub></sub> -directed synthesis of the $\alpha$ NTD fused to <i>Yersinia</i> YscB                                                                                                                   | This study                          |

**Table S2. Table S2. Primers used for PCR, qPCR or RT-qPCR**

| <b>Primer</b>    | <b>Sequence (5'-3')</b>       | <b>Purpose</b> |
|------------------|-------------------------------|----------------|
| <i>copN</i> -rtF | CGCTTCGCTCCTTATATTTTC         | RT-qPCR        |
| <i>copN</i> -rtR | CCATAACAGCGGTTTTCTCT          |                |
| <i>tuf</i> -rtF  | GTAACCTCTGCCTGAGGGAATTGA      | qPCR           |
| <i>tuf</i> -rtR  | CACGAATCGCAAATCTCATAACCT      | RT-qPCR        |
| <i>omcB</i> -rtF | GTTTGCGTTGCCAGTAGTT           | RT-qPCR        |
| <i>omcB</i> -rtR | CACGCTGTCCAGAAGAATGA          |                |
| <i>euo</i> -rtF  | TCAAGGAGAGCTTCTGTTTTGATAAC    | RT-qPCR        |
| <i>euo</i> -rtR  | TGCGTGTAGCATAGTAAATCTTCTG     |                |
| <i>scc1</i> -rtF | CTTGAAAACCTCCAGAGAATACCT      | RT-qPCR        |
| <i>scc1</i> -rtR | TGGTTAGAGATTTACCGTATCCTA      |                |
| <i>setU</i> -rtF | CTGCGATTACGTTTCATTGTCT CC     | RT-qPCR        |
| <i>setU</i> -rtR | ATGATTCTGGGGAGCTGTTTTAAA      |                |
| <i>slc1</i> -rtF | ACACTCTGATCGCCTTTATGTTTAC     | RT-qPCR        |
| <i>slc1</i> -rtR | GCATAGAGCCTTCTAACAACCTTCTC    |                |
| <i>scc1</i> -rtF | CTTGAAAACCTCCAGAGAATACCT      | RT-qPCR        |
| <i>scc1</i> -rtR | TGGTTAGAGATTTACCGTATCCTA      |                |
| <i>incD</i> -rtF | CTCTGTAGCCCTGTTTCTGTTTTAG     | RT-qPCR        |
| <i>incD</i> -rtR | CTAGTCACAGCTTCTGTAGTCAGCA     |                |
| <i>scc4</i> F    | TTTAAACTAGAGATGAGCACGTGAATACA | PCR            |
| mcherryR1        | TAAATCCTTCTGGAAAAGAGAGCTT     | Sequencing     |

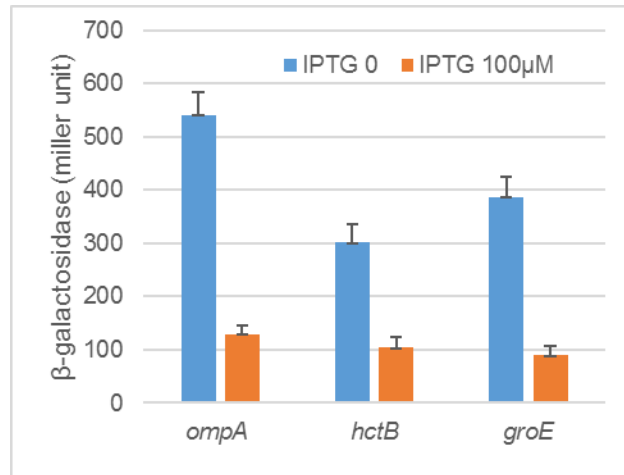

**Figure S1.** Analysis of promoter activity using  $\beta$ -galactosidase reporter assay. The overnight cultures *E. coli* BL21(DE3) cells carrying pCDFSc4 were diluted in fresh medium at the ratio of 1:100 and cultured in LB broth at 37 °C. When bacteria grown to  $OD_{600}=0.2$ , isopropyl- $\beta$ -D-thiogalactopyranoside (IPTG) was added to induce Sc4 expression. The control was cultured in the absence of IPTG. The cultures were harvested for  $\beta$ -galactosidase reporter assay with the method described previously (3). The data are presented as mean  $\pm$  SD of  $\beta$ -galactosidase (miller Units) from one representative experiment with three repeats. At least three independent experiments were performed.

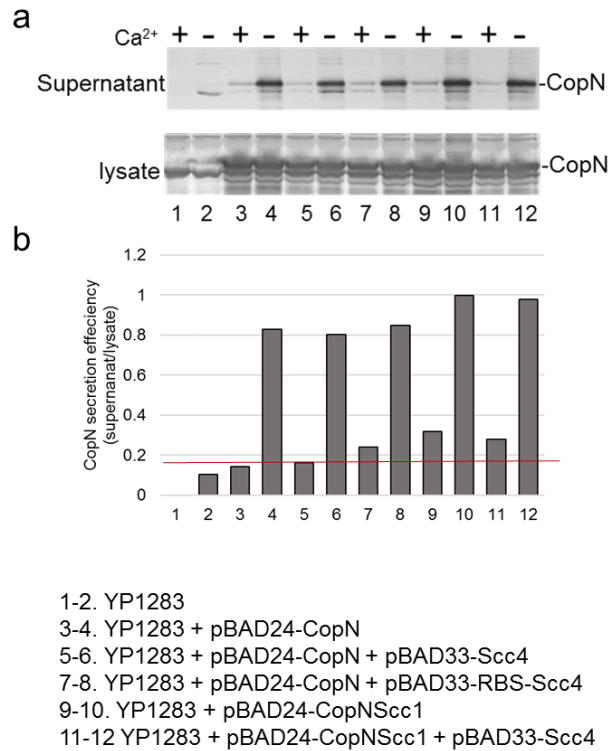

**Figure S2** CopN secretion assays using YP1283. **(a)** immunoblot analysis of CopN secretion. *Y. pestis* was cultivated in HIB medium in the presence (+) or absence (-) of 2.5 mM Ca<sup>2+</sup>. After an initial 2-h incubation at 26 °C, IPTG (100 μM) was added. Bacterial cultures were then shifted to 37 °C and continued culturing for 4 h prior to harvesting. Samples representing culture supernatant and bacterial lysates were resolved in 12% polyacrylamide gels and analyzed by immunoblotting with an anti-CopN antibody, followed by visualization of protein by probing with alkaline phosphatase-conjugated secondary antibodies. **(b)** Ratio of secreted CopN levels (in supernatants) to the intracellular levels (lysates). Protein blot in **(a)** was measured using ImageJ. The red line represent the background.

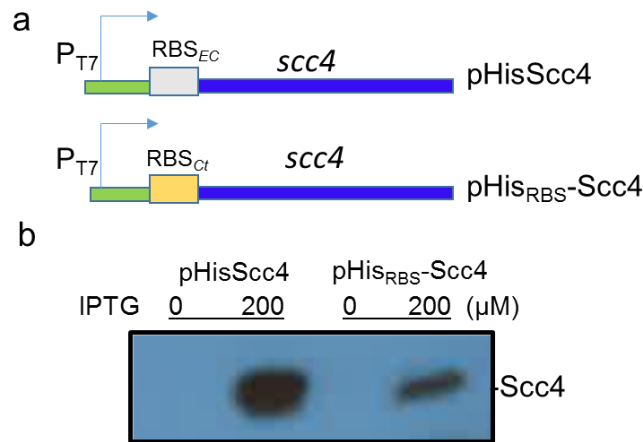

**Figure S3** *C. trachomatis* *scc4* ribosome-binding site (RBS) weakly functions to direct the initiation of Scc4 synthesis in *E. coli*. **(a)** Schematic diagram showing the cloning strategy to construct pET15b-derived expression vectors: pHisScc4 containing an optimal *E. coli* RBS and pHisRBS-Scc4 containing the *C. trachomatis* RBS upstream of *scc4*. **(b)** Immunoblot analysis of Scc4 expression in *E. coli*. BL21(DE3) cells were transformed with pHisScc4 or pHisRBS-Scc4 and cultured in LB. IPTG (200 μM) was added to induce protein expression. The protein samples were resolved in 10% (wt/vol) polyacrylamide gels and analyzed by immunoblotting with an anti-Scc4 antibody, followed by visualization of protein by probing with alkaline phosphatase-conjugated secondary antibodies. The protein samples from bacteria culture without IPTG addition were used as the controls.

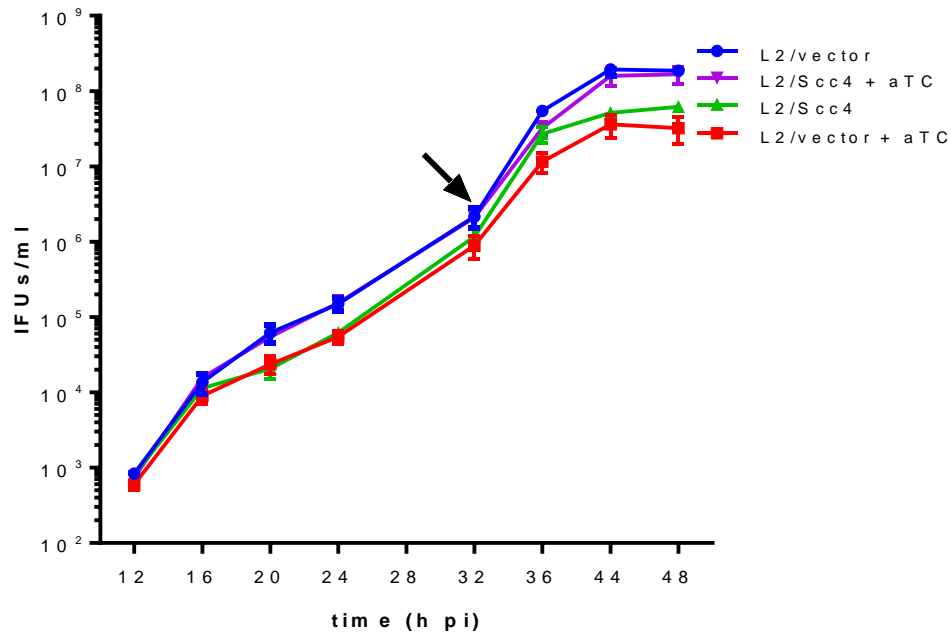

**Figure S4** End-point growth curves of *C. trachomatis* measured by inclusion forming unit assay (IFU assay) of infectious EBs. Infected HeLa cells were sampled for analysis at different times as indicated. The aliquot of dilutions were inoculated onto fresh monolayer HeLa cells and cultured for 40 h. Inclusions were then stained with a mouse monoclonal primary antibody against LGV L2 MOMP, followed by staining with goat anti-mouse IgG Alexa Fluor 567-conjugate secondary antibody. The quantity of inclusion forming units were counted and converted to IFUs/ml. All values are presented as means  $\pm$  SD of triplicate samples. An arrow shows the close similarities of IFUs among each strain at 32 h pi.

## References:

1. Gong S, Yang Z, Lei L, Shen L, Zhong G. 2013. Characterization of *Chlamydia trachomatis* plasmid-encoded open reading frames. *J Bacteriol* 195:3819-3826.
2. Cong Y, Gao L, Zhang Y, Xian Y, Hua Z, Elaasar H, Shen L. 2016. Quantifying promoter activity during the developmental cycle of *Chlamydia trachomatis*. *Scientific Reports* 6:27244.
3. Rao X, Deighan P, Hua Z, Hu X, Wang J, Luo M, Wang J, Liang Y, Zhong G, Hochschild A, Shen L. 2009. A regulator from *Chlamydia trachomatis* modulates the activity of RNA polymerase through direct interaction with the  $\beta$  subunit and the primary  $\sigma$  subunit. *Genes & Development* 23:1818-1829.
4. Bartra SS, Jackson MW, Ross JA, Plano GV. 2006. Calcium-regulated type III secretion of Yop proteins by an *Escherichia coli* hha mutant carrying a *Yersinia pestis* pCD1 virulence plasmid. *Infection and immunity* 74:1381-1386.
5. Shen L MM, Frohlich KM, Cong Y, Goodwin OY, Chou CW, LeCour L Jr, Krup KL, Luo M, Worthylake DK. 2015. Multipart Chaperone-effector Recognition in the Type III Secretion System of *Chlamydia trachomatis*. *J Biol Chem*:Oct 5. pii: jbc.M115.670232. [Epub ahead of print].
6. Artsimovitch I, Vassylyeva, M.N., Svetlov, D., Svetlov, V., Perederina, A., Igarashi, N., Matsugaki N, Wakatsuki, S., Tahirov, T.H., and Vassylyev, D.G. . . 2005. Allosteric modulation of the RNA polymerase catalytic reaction is an essential component of transcription control by rifamycins. *Cell* 122:351-363. .
7. Hua Z, Rao X, Feng X, Luo X, Liang Y, Shen L. 2009. Mutagenesis of Region 4 of Sigma 28 from *Chlamydia trachomatis* Defines Determinants for Protein-Protein and Protein-DNA Interactions. *Journal of Bacteriology* 191:651-660.
8. Wang Y, deHaseth PL. 2003. Sigma 32-dependent promoter activity in vivo: sequence determinants of the groE promoter. *Journal of bacteriology* 185:5800-5806.
